# Supplementary material for: Relevance of HOTAIR rs920778 and rs12826786 Genetic Variants in Bladder Cancer Risk and Survival
Source: MDPI journal article supplement (doi:10.3390/cancers16020434), 2024-01-19
Supplement: s1 [file s1]

Article

# Relevance of *HOTAIR* rs920778 and rs12826786 Genetic Variants in Bladder Cancer Risk and Survival

Eduarda P. Martins, Joana Vieira de Castro, Rita Fontes, Sara Monteiro-Reis, Rui Henrique, Carmen Jerónimo and Bruno M. Costa

## Supplementary Materials

Supplementary Materials include:

- Supplementary tables:
  - **Table S1.** Age and sex distribution in cancer-free controls and bladder cancer patients.
  - **Table S2.** Univariable logistic regression analysis of the association between *HOTAIR* rs920778 and rs12826786 genetic variants and bladder cancer risk.
  - **Table S3.** Multivariable logistic regression analysis of the association between *HOTAIR* rs920778 and rs12826786 genetic variants and bladder cancer risk.
  - **Table S4.** Multivariable Cox analyses of the association between *HOTAIR* rs920778 and rs12826786 SNPs and overall survival in all bladder cancer patients with tumors staged as pT2, pT3 or pT4.
  - **Table S5.** Multivariable Cox analyses of the association between *HOTAIR* rs920778 and rs12826786 SNPs and recurrence-free survival in all bladder cancer patients and in patients over 65 years.

**Table S1.** Age and sex distribution in cancer-free controls and bladder cancer patients.

|            | Controls                  |                              | Cases                  |
|------------|---------------------------|------------------------------|------------------------|
|            | All controls<br>(n = 199) | Matched controls<br>(n = 93) | All cases<br>(n = 106) |
| <i>Age</i> |                           |                              |                        |
| Range      | 27 – 85                   | 45 – 85                      | 37 – 91                |
| Mean       | 46                        | 59                           | 67                     |
| Median     | 43                        | 56                           | 69                     |
| <i>Sex</i> |                           |                              |                        |
| Male       | 130                       | 55                           | 83                     |
| Female     | 69                        | 38                           | 23                     |

**Table S2.** Univariable logistic regression analysis of the association between *HOTAIR* rs920778 and rs12826786 genetic variants and bladder cancer risk.

| Polymorphism                    | Matched controls | Cases       | OR [95% CI] <sup>a</sup> | <i>p</i> -value |
|---------------------------------|------------------|-------------|--------------------------|-----------------|
| <b><i>HOTAIR</i> rs920778</b>   |                  |             |                          |                 |
| Genotype                        |                  |             |                          |                 |
| TT                              | 43 (46.2%)       | 49 (46.2%)  | –                        | 0.922           |
| CT                              | 36 (38.7%)       | 43 (40.6%)  | 1.048 [0.573 – 1.916]    | 0.878           |
| CC                              | 14 (15.1%)       | 14 (13.2%)  | 0.878 [0.376 – 2.046]    | 0.762           |
| CC+CT                           | 50 (53.8%)       | 57 (53.8%)  | 1.000 [0.572 – 1.749]    | 0.999           |
| Alleles                         |                  |             |                          |                 |
| T                               | 122 (65.6%)      | 141 (66.5%) | –                        | –               |
| C                               | 64 (34.4%)       | 71 (33.5%)  | 0.960 [0.633 – 1.455]    | 0.847           |
| <b><i>HOTAIR</i> rs12826786</b> |                  |             |                          |                 |
| Genotype                        |                  |             |                          |                 |
| CC                              | 44 (47.3%)       | 52 (49.1%)  | –                        | 0.427           |
| CT                              | 39 (41.9%)       | 48 (45.3%)  | 1.041 [0.581 – 1.865]    | 0.891           |
| TT                              | 10 (10.8%)       | 6 (5.7%)    | 0.508 [0.171 – 1.508]    | 0.222           |
| TT+CT                           | 49 (52.7%)       | 54 (50.9%)  | 0.932 [0.534 – 1.628]    | 0.806           |
| Alleles                         |                  |             |                          |                 |
| C                               | 127 (68.3%)      | 152 (71.7%) | –                        | –               |
| T                               | 59 (31.7%)       | 60 (28.3%)  | 0.850 [0.553 – 1.306]    | 0.458           |

<sup>a</sup>Odds ratio (OR) with 95% confidence intervals (CI).

**Table S3.** Multivariable logistic regression analysis of the association between *HOTAIR* rs920778 and rs12826786 genetic variants and bladder cancer risk.

| Polymorphism                    | Matched controls | Cases       | OR [95% CI] <sup>a</sup>     | <i>p</i> -value    |
|---------------------------------|------------------|-------------|------------------------------|--------------------|
| <b><i>HOTAIR</i> rs920778</b>   |                  |             |                              |                    |
| Genotype                        |                  |             |                              |                    |
| TT                              | 43 (46.2%)       | 49 (46.2%)  | –                            | 0.663              |
| CT                              | 36 (38.7%)       | 43 (40.6%)  | 1.296 [0.654 – 2.568]        | 0.457              |
| CC                              | 14 (15.1%)       | 14 (13.2%)  | 0.892 [0.352 – 2.258]        | 0.809              |
| CC+CT                           | 50 (53.8%)       | 57 (53.8%)  | 1.168 [0.623 – 2.187]        | 0.629              |
| Alleles                         |                  |             |                              |                    |
| T                               | 122 (65.6%)      | 141 (66.5%) | –                            | –                  |
| C                               | 64 (34.4%)       | 71 (33.5%)  | 1.019 [0.641 – 1.620]        | 0.935              |
| Age <sup>b</sup>                |                  |             | <b>1.088 [1.055 – 1.122]</b> | <b>&lt; 0.0001</b> |
| Sex                             |                  |             |                              |                    |
| Male                            | 55 (59.1%)       | 83 (78.3%)  | –                            | –                  |
| Female                          | 38 (40.9%)       | 23 (21.7%)  | <b>0.273 [0.134 – 0.556]</b> | <b>&lt; 0.001</b>  |
| <b><i>HOTAIR</i> rs12826786</b> |                  |             |                              |                    |
| Genotype                        |                  |             |                              |                    |
| CC                              | 44 (47.3%)       | 52 (49.1%)  | –                            | 0.198              |
| CT                              | 39 (41.9%)       | 48 (45.3%)  | 1.320 [0.681 – 2.561]        | 0.411              |
| TT                              | 10 (10.8%)       | 6 (5.7%)    | 0.435 [0.130 – 1.454]        | 0.176              |
| TT+CT                           | 49 (52.7%)       | 54 (50.9%)  | 1.099 [0.588 – 2.056]        | 0.767              |
| Alleles                         |                  |             |                              |                    |
| C                               | 127 (68.3%)      | 152 (71.7%) | –                            | –                  |
| T                               | 59 (31.7%)       | 60 (28.3%)  | 0.892[0.552 – 1.440]         | 0.640              |
| Age <sup>b</sup>                |                  |             | <b>1.089 [1.055 – 1.123]</b> | <b>&lt; 0.0001</b> |
| Sex                             |                  |             |                              |                    |
| Male                            | 55 (59.1%)       | 83 (78.3%)  | –                            | –                  |
| Female                          | 38 (40.9%)       | 23 (21.7%)  | <b>0.256 [0.124 – 0.529]</b> | <b>&lt; 0.001</b>  |

<sup>a</sup>Odds ratio (OR) with 95% confidence intervals (CI); <sup>b</sup>age as continuous variable. Bold-faced values represent statistically significant differences ( $p < 0.05$ ). Odds ratios and *p*-values for age at diagnosis and sex indicate those determined in multivariable logistic regression using the three groups of genotypes (CC, CT, and TT genotypes) individually.

**Table S4.** Multivariable Cox analyses of the association between *HOTAIR* rs920778 and rs12826786 SNPs and overall survival in all bladder cancer patients with tumors staged as pT2, pT3 or pT4.

| Polymorphism                    | pT2-pT4 patients | HR [95% CI] <sup>a</sup>     | <i>p</i> -value |
|---------------------------------|------------------|------------------------------|-----------------|
| <b><i>HOTAIR</i> rs920778</b>   |                  |                              |                 |
| Genotype                        |                  |                              |                 |
| TT                              | 15               | –                            | 0.359           |
| CT                              | 13               | 1.901 [0.742 – 4.868]        | 0.181           |
| CC                              | 5                | 1.800 [0.584 – 5.545]        | 0.306           |
| CC+CT                           | 18               | 1.865 [0.793 – 4.386]        | 0.153           |
| Age at diagnosis <sup>b</sup>   |                  | 1.010 [0.965 – 1.056]        | 0.679           |
| Sex                             |                  |                              |                 |
| Male                            | 30               | –                            | –               |
| Female                          | 3                | 0.419 [0.083 – 2.113]        | 0.292           |
| <b><i>HOTAIR</i> rs12826786</b> |                  |                              |                 |
| Genotype                        |                  |                              |                 |
| CC                              | 13               | –                            | 0.119           |
| CT                              | 16               | <b>2.865 [1.026 – 7.999]</b> | <b>0.044</b>    |
| TT                              | 4                | 2.494 [0.700 – 8.889]        | 0.159           |
| TT+CT                           | 20               | <b>2.746 [1.046 – 7.210]</b> | <b>0.040</b>    |
| Age at diagnosis <sup>b</sup>   |                  | 1.001 [0.954 – 1.051]        | 0.962           |
| Sex                             |                  |                              |                 |
| Male                            | 30               | –                            | –               |
| Female                          | 3                | 0.300 [0.057 – 1.588]        | 0.157           |

<sup>a</sup>Hazard ratio (HR) with 95% confidence intervals (CI); <sup>b</sup>age as continuous variable. Bold-faced values represent statistically significant differences ( $P < 0.05$ ). Hazard ratios and *p*-values for age at diagnosis, sex, and primary tumor pathological stage indicate those determined in multivariable Cox regression using the three groups of genotypes (CC, CT, and TT genotypes) individually.

**Table S5.** Multivariable Cox analyses of the association between *HOTAIR* rs920778 and rs12826786 SNPs and recurrence-free survival in all bladder cancer patients and in patients over 65 years.

| Polymorphism                    | All patients | HR<br>[95% CI] <sup>a</sup>   | <i>p</i> -<br>value | ≥ 65 years<br>patients | HR<br>[95% CI] <sup>a</sup>       | <i>p</i> -<br>value |
|---------------------------------|--------------|-------------------------------|---------------------|------------------------|-----------------------------------|---------------------|
| <b><i>HOTAIR</i> rs920778</b>   |              |                               |                     |                        |                                   |                     |
| Genotype                        |              |                               |                     |                        |                                   |                     |
| TT                              | 49           | –                             | 0.951               | 34                     | –                                 | 0.343               |
| CT                              | 43           | 1.052 [0.621 – 1.783]         | 0.850               | 25                     | 1.633 [0.832 – 3.206]             | 0.154               |
| CC                              | 14           | 1.131 [0.505 – 2.535]         | 0.764               | 8                      | 1.091 [0.346 – 3.439]             | 0.882               |
| CC+CT                           | 57           | 1.069 [0.650 – 1.756]         | 0.793               | 33                     | 1.515 [0.787 – 2.914]             | 0.213               |
| Age at diagnosis <sup>b</sup>   |              | 0.996 [0.969 – 1.024]         | 0.788               | –                      | –                                 | –                   |
| Sex                             |              |                               |                     |                        |                                   |                     |
| Male                            | 83           | –                             | –                   | 48                     | –                                 | –                   |
| Female                          | 23           | 0.983 [0.525 – 1.841]         | 0.957               | 19                     | 1.068 [0.528 – 2.160]             | 0.854               |
| Pathological stage (pT)         |              |                               |                     |                        |                                   |                     |
| pTis                            | 4            | –                             | <b>0.004</b>        | 3                      | –                                 | <b>0.005</b>        |
| pTa                             | 47           | 0.842 [0.197 – 3.599]         | 0.816               | 27                     | 1.504 [0.193 – 11.700]            | 0.697               |
| pT1                             | 22           | 0.915 [0.203 – 4.130]         | 0.908               | 17                     | 1.625 [0.195 – 13.510]            | 0.653               |
| pT2                             | 20           | 1.534 [0.346 – 6.797]         | 0.573               | 13                     | 1.791 [0.211 – 15.178]            | 0.593               |
| pT3                             | 9            | 0.811 [0.159 – 4.128]         | 0.801               | 5                      | 1.029 [0.104 – 10.216]            | 0.980               |
| pT4                             | 4            | <b>7.475 [1.326 – 42.147]</b> | <b>0.023</b>        | 2                      | <b>96.947 [5.691 – 1651.514]</b>  | <b>0.002</b>        |
| <b><i>HOTAIR</i> rs12826786</b> |              |                               |                     |                        |                                   |                     |
| Genotype                        |              |                               |                     |                        |                                   |                     |
| CC                              | 52           | –                             | 0.211               | 36                     | –                                 | <b>0.025</b>        |
| CT                              | 48           | 1.298 [0.781 – 2.155]         | 0.314               | 28                     | 1.916 [0.998 – 3.678]             | 0.051               |
| TT                              | 6            | 2.223 [0.870 – 5.680]         | 0.095               | 3                      | <b>4.985 [1.320 – 18.829]</b>     | <b>0.018</b>        |
| TT+CT                           | 54           | 1.386 [0.851 – 2.258]         | 0.190               | 31                     | <b>2.057 [1.091 – 3.877]</b>      | <b>0.026</b>        |
| Age at diagnosis <sup>b</sup>   |              | 0.999 [0.972 – 1.026]         | 0.927               | –                      | –                                 | –                   |
| Sex                             |              |                               |                     |                        |                                   |                     |
| Male                            | 83           | –                             | –                   | 48                     | –                                 | –                   |
| Female                          | 23           | 0.961 [0.512 – 1.807]         | 0.902               | 19                     | 0.948 [0.472 – 1.907]             | 0.882               |
| Pathological stage (pT)         |              |                               |                     |                        |                                   |                     |
| pTis                            | 4            | –                             | <b>0.004</b>        | 3                      | –                                 | <b>0.003</b>        |
| pTa                             | 47           | 0.857 [0.201 – 3.660]         | 0.835               | 27                     | 1.590 [0.205 – 12.341]            | 0.657               |
| pT1                             | 22           | 0.945 [0.209 – 4.283]         | 0.942               | 17                     | 1.862 [0.225 – 15.447]            | 0.564               |
| pT2                             | 20           | 1.492 [0.334 – 6.657]         | 0.600               | 13                     | 1.591 [0.191 – 13.223]            | 0.668               |
| pT3                             | 9            | 0.709 [0.137 – 3.678]         | 0.683               | 5                      | 0.945 [0.095 – 9.423]             | 0.961               |
| pT4                             | 4            | <b>7.526 [1.327 – 42.677]</b> | <b>0.023</b>        | 2                      | <b>116.809 [6.814 – 2002.337]</b> | <b>0.001</b>        |

<sup>a</sup>Hazard ratio (HR) with 95% confidence intervals (CI); <sup>b</sup>age as continuous variable. Bold-faced values represent statistically significant differences ( $p < 0.05$ ). Hazard ratios and  $p$ -values for age at diagnosis, sex, and primary tumor pathological stage indicate those determined in multivariable Cox regression using the three groups of genotypes (CC, CT, and TT genotypes) individually.
